# Supplementary material for: Mechanochemical preparation of a modified NiAl2O4structure
Source: Royal Society of Chemistry journal article supplement (doi:10.1039/d2fd00099g), 2022-07-14

Supplementary information:

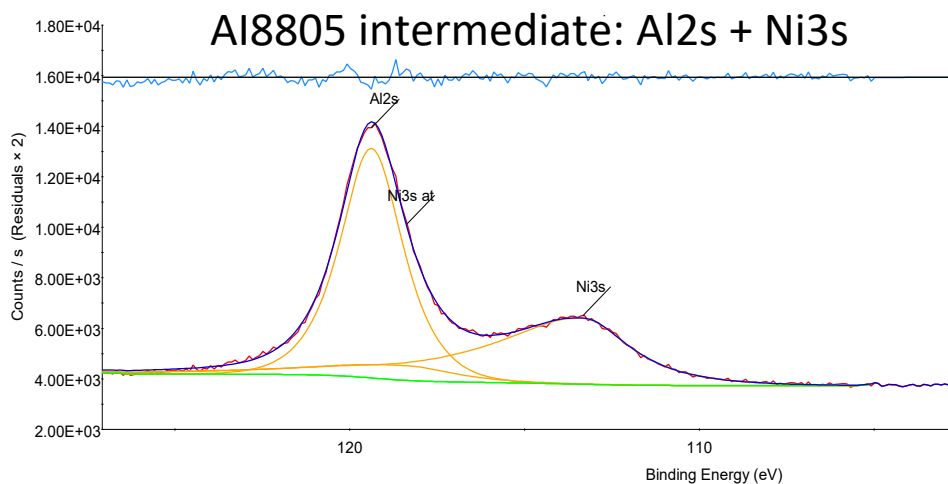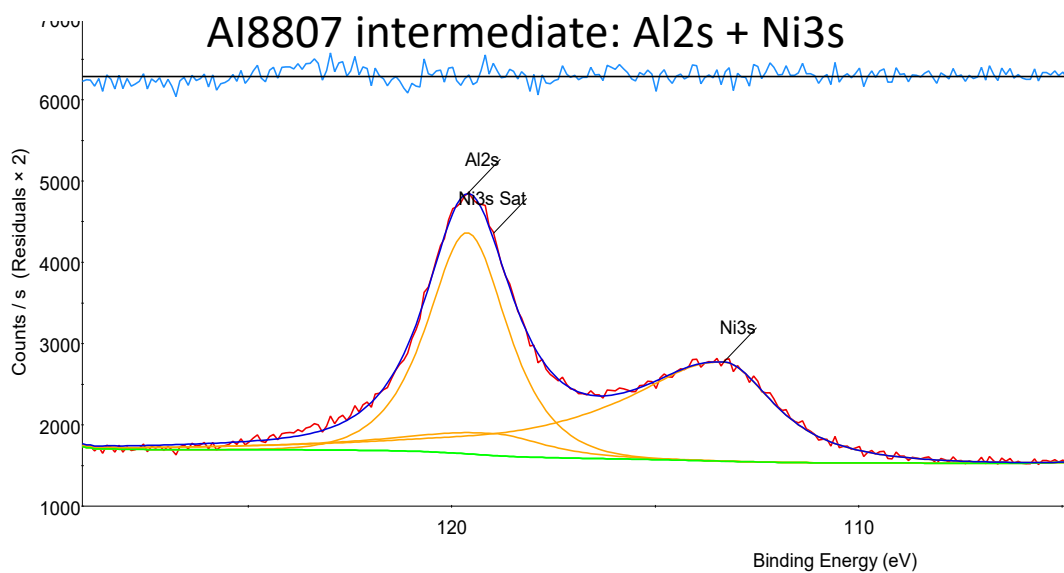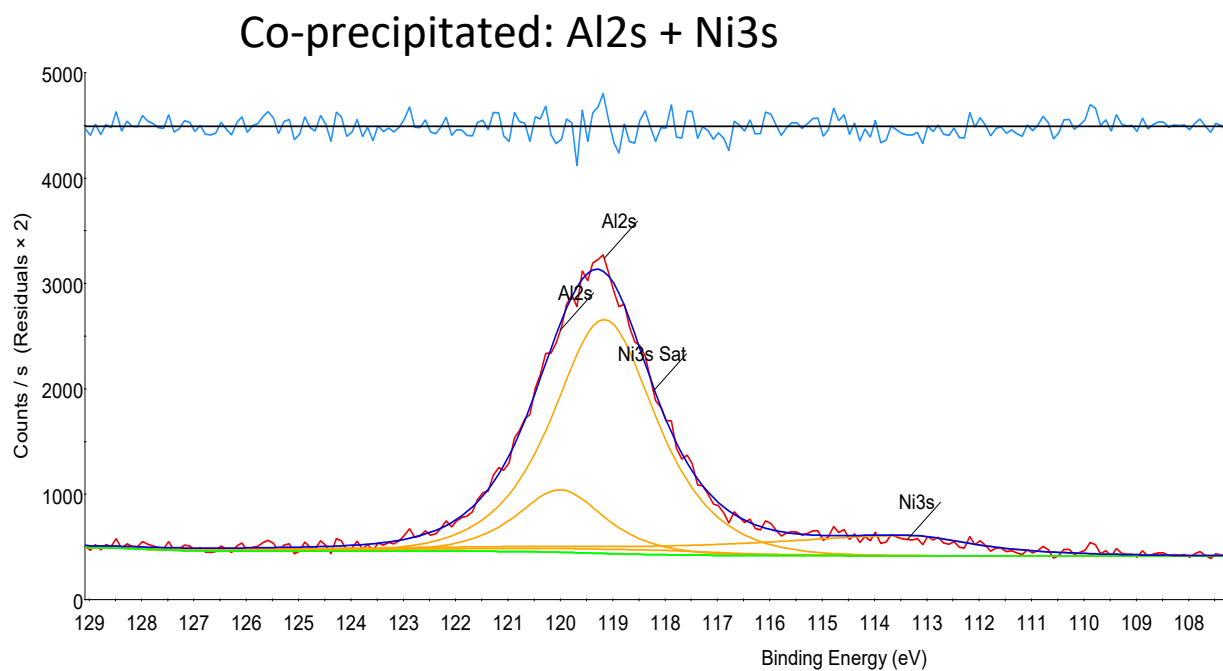

### Mid Energy 750 °C : Al2s + Ni3s

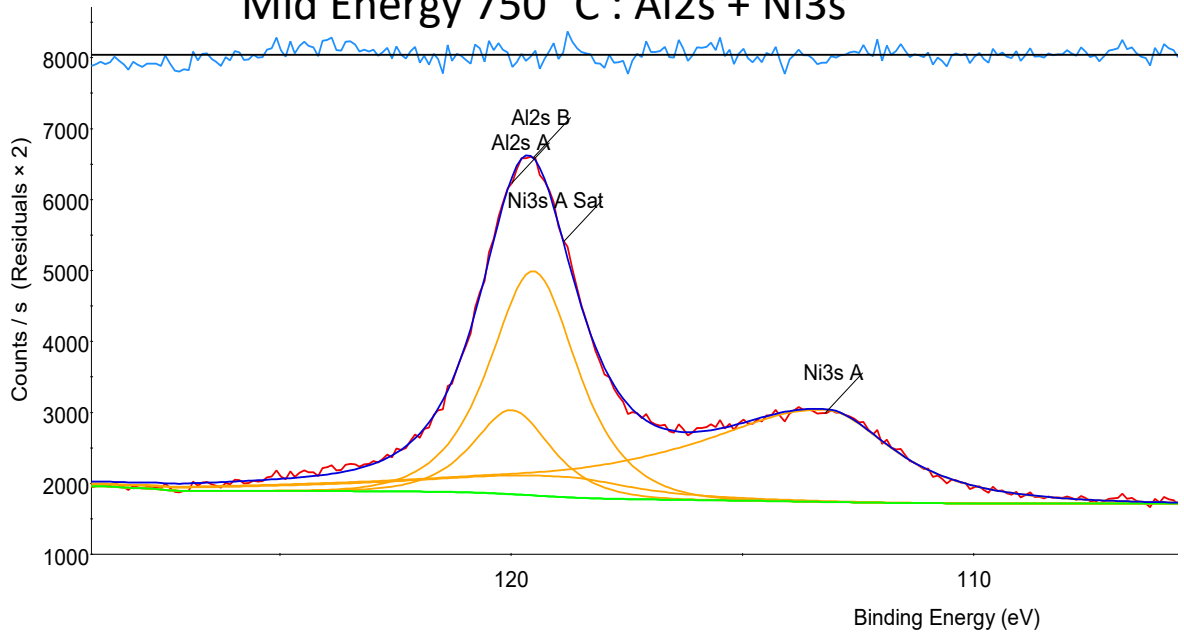

### High Energy 750 °C : Al2s + Ni3s

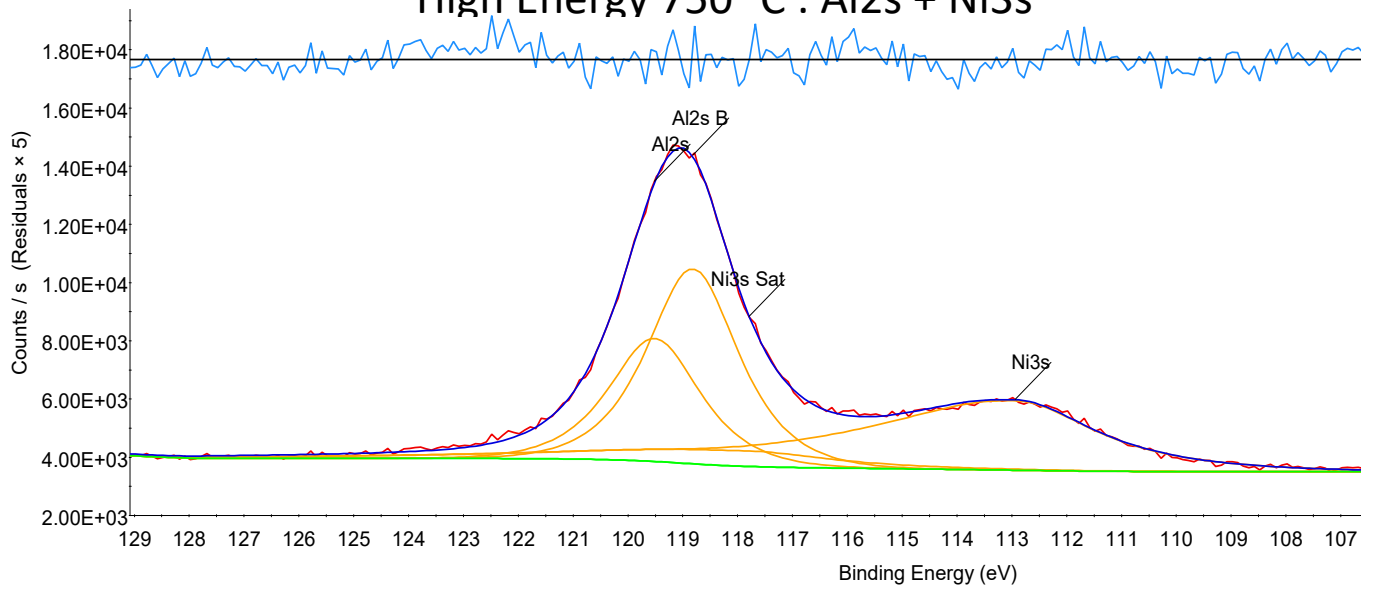

### High Energy 900 °C : Al2s + Ni3s

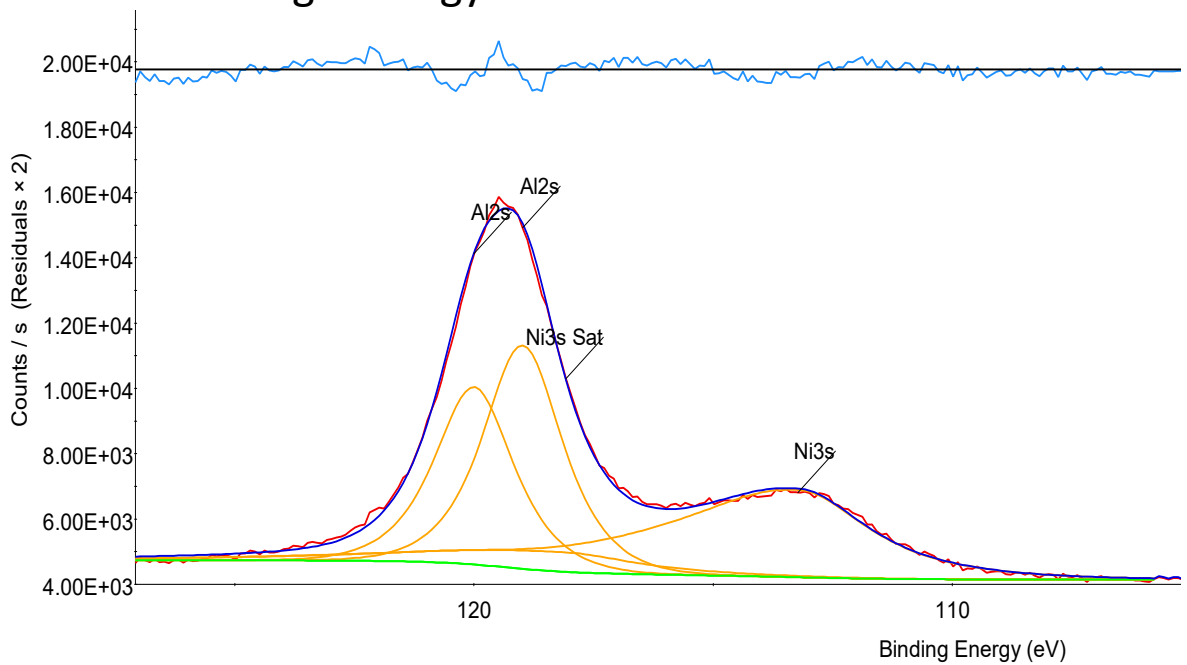

Ni:Al ratios

|                 |        | Intermediate Ni:Al | Calcined Ni:Al |
|-----------------|--------|--------------------|----------------|
| Ground Baseline | na     | 0.5                |                |
| Co-precipitated | 800 °C |                    | 0.2            |
| Mid energy      | 750 °C | 1.7                | 1.1            |
| High energy     | 750 °C | 1.2                | 0.9            |
|                 | 900 °C |                    | 0.9            |

Full Ni2p spectra

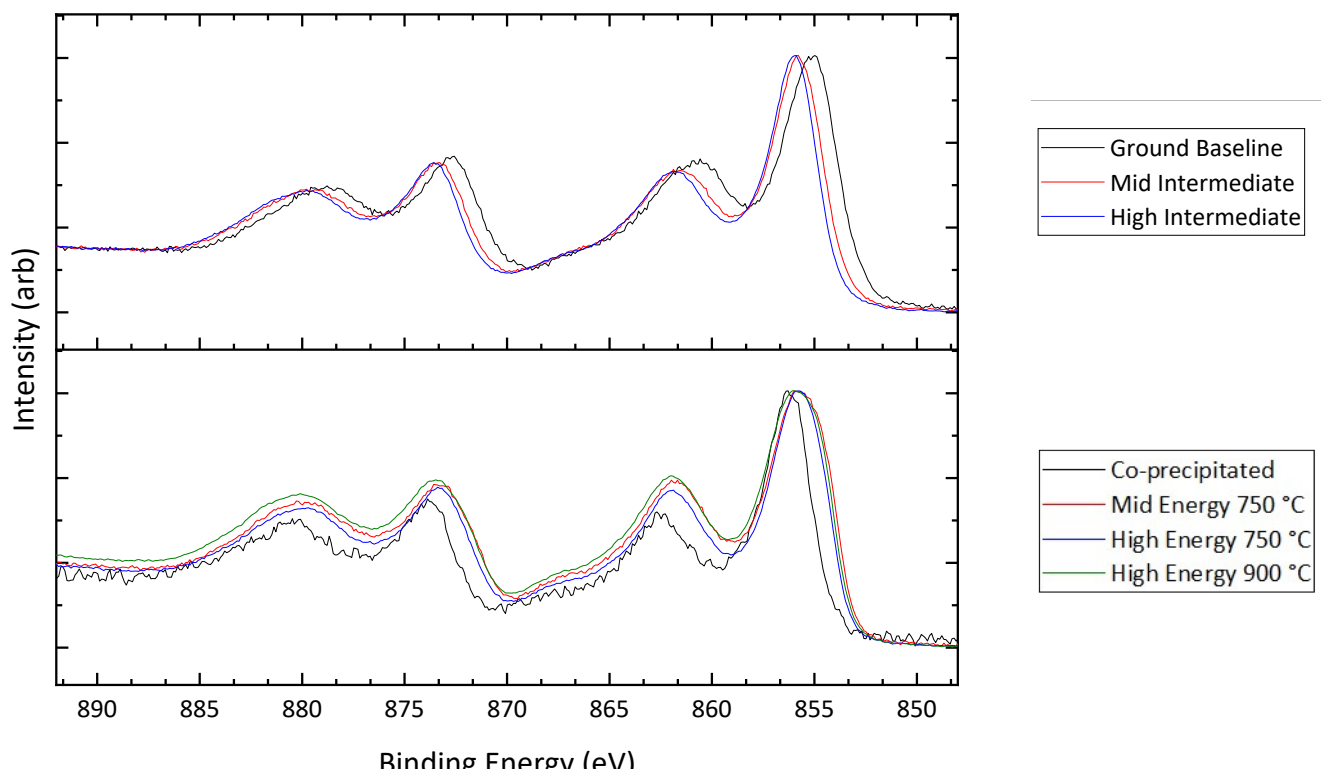

Supplement: d2fd00099g1.pdf [file d2fd00099g1.pdf]
